# Supplementary material for: Mechanisms of IR amplification in radical cation polarons
Source: Royal Society of Chemistry journal article supplement (doi:10.1039/c9sc05717j), 2020-01-01
Supplement: c9sc05717j2.pdf [file c9sc05717j2.pdf]

# Fundamental Mechanisms of Charge Transport in Organic Semiconductors

Organic semiconductors are important materials for a variety of applications including display devices and solar cells

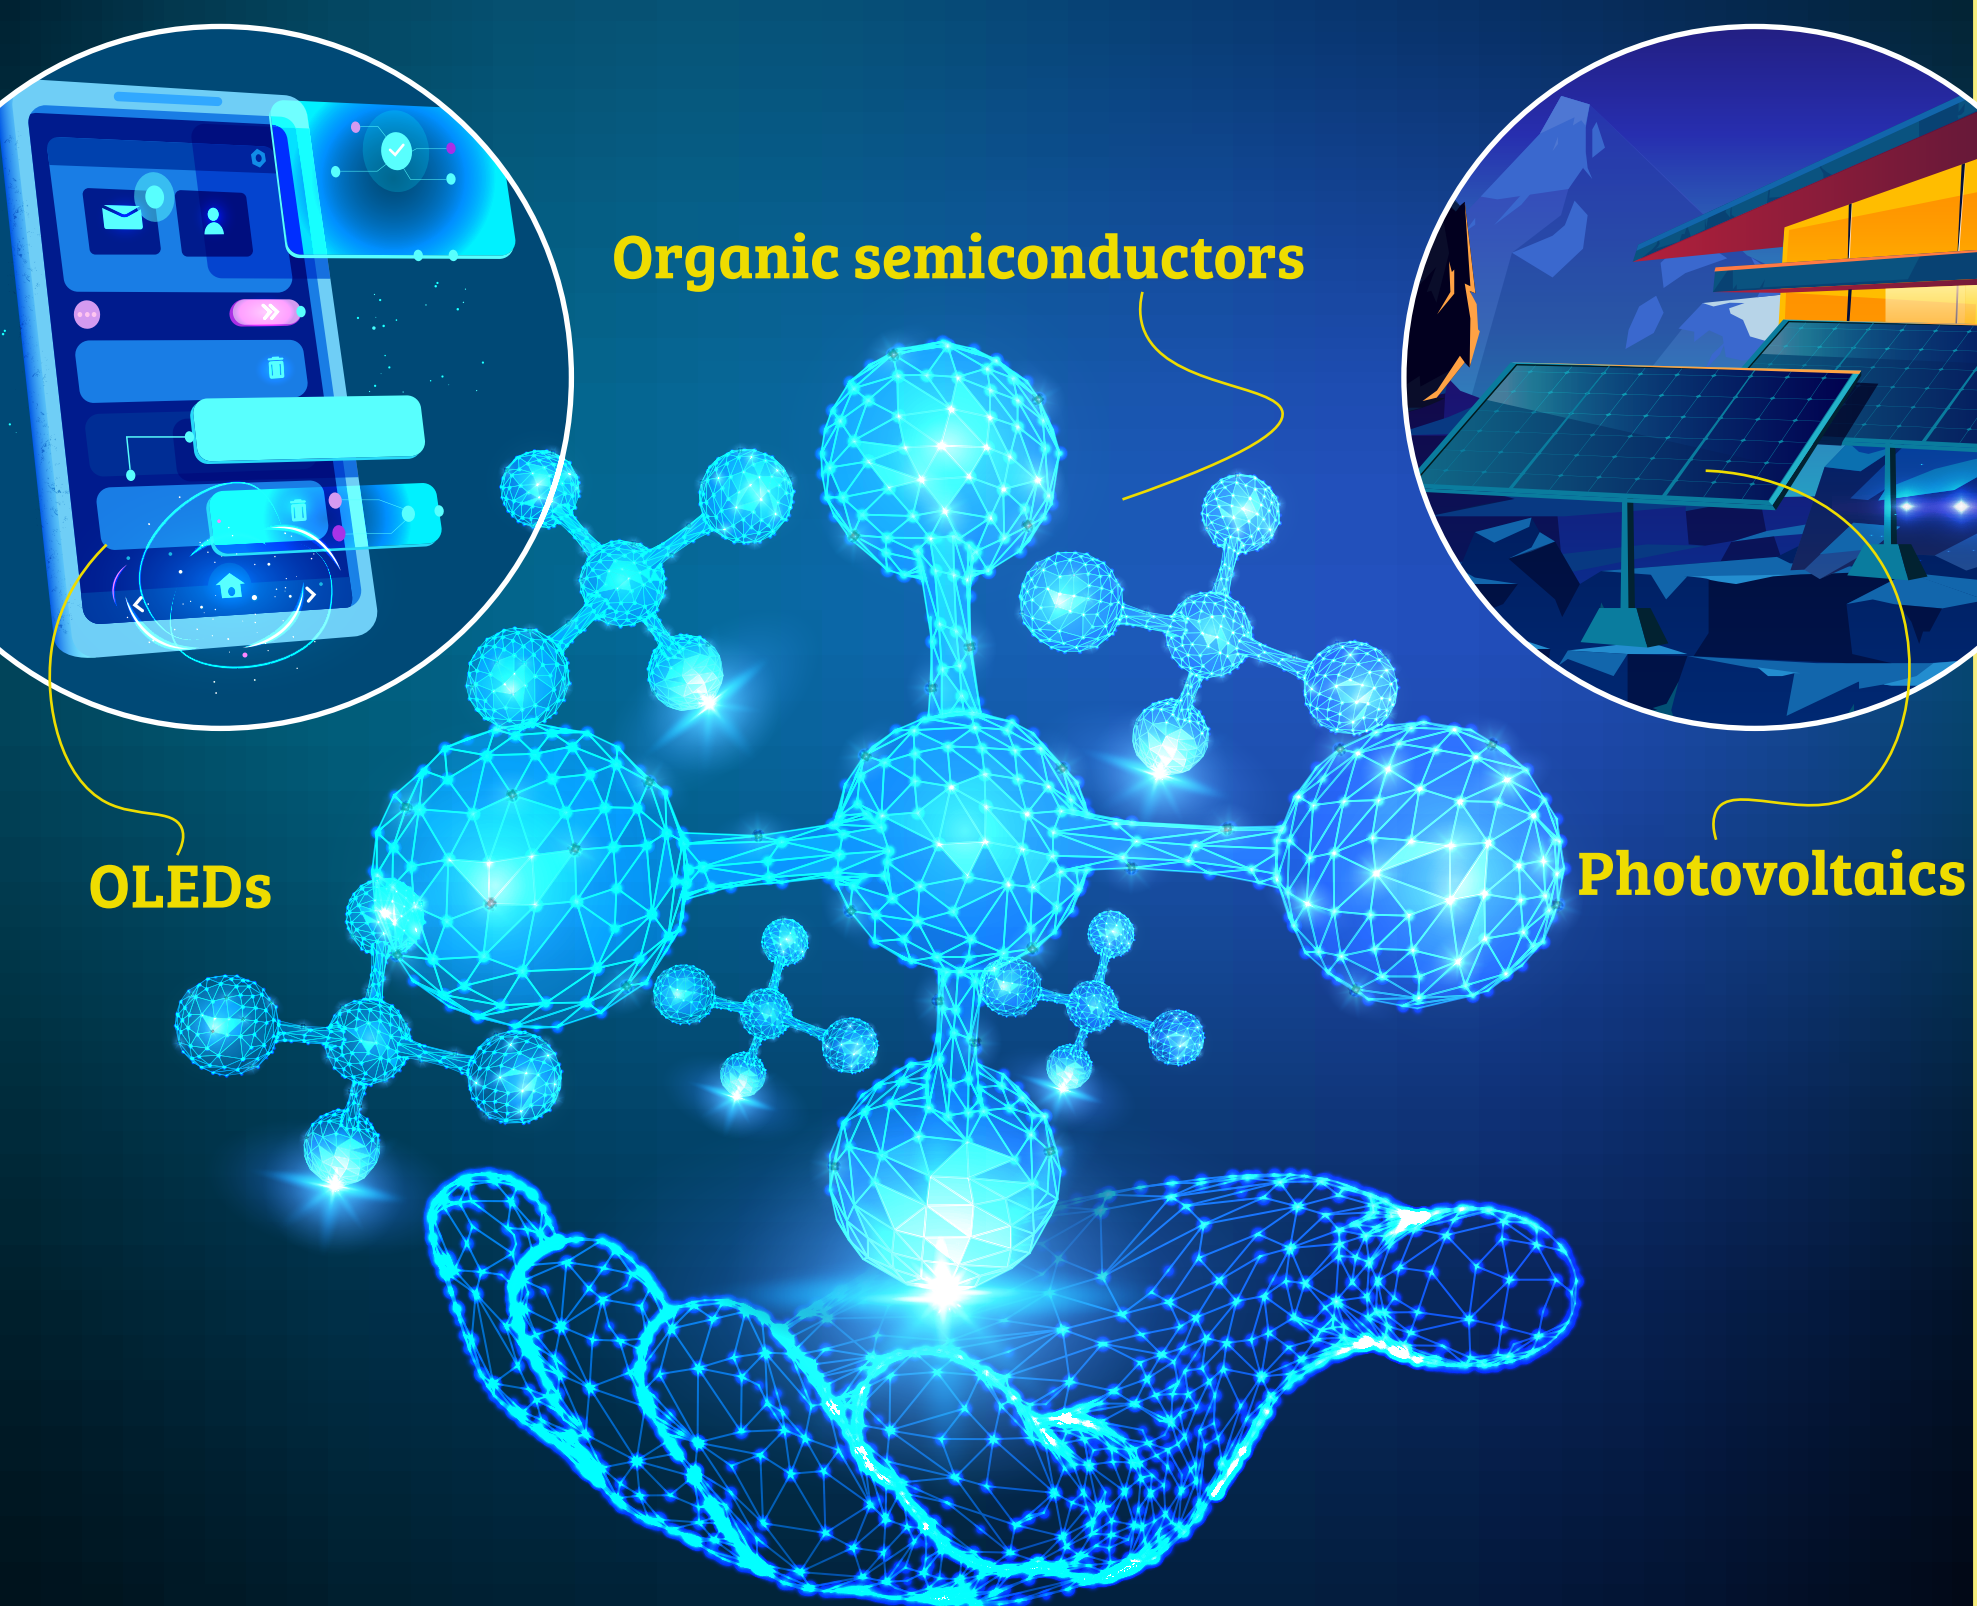

Organic semiconductor structures can be endlessly fine-tuned to change their properties

A better understanding of structure-property relationships is required to exploit the versatility of organic semiconductors

Infrared active vibrations (IRAVs) of organic semiconductors are studied using advanced ultrafast time-resolved infrared spectroscopies

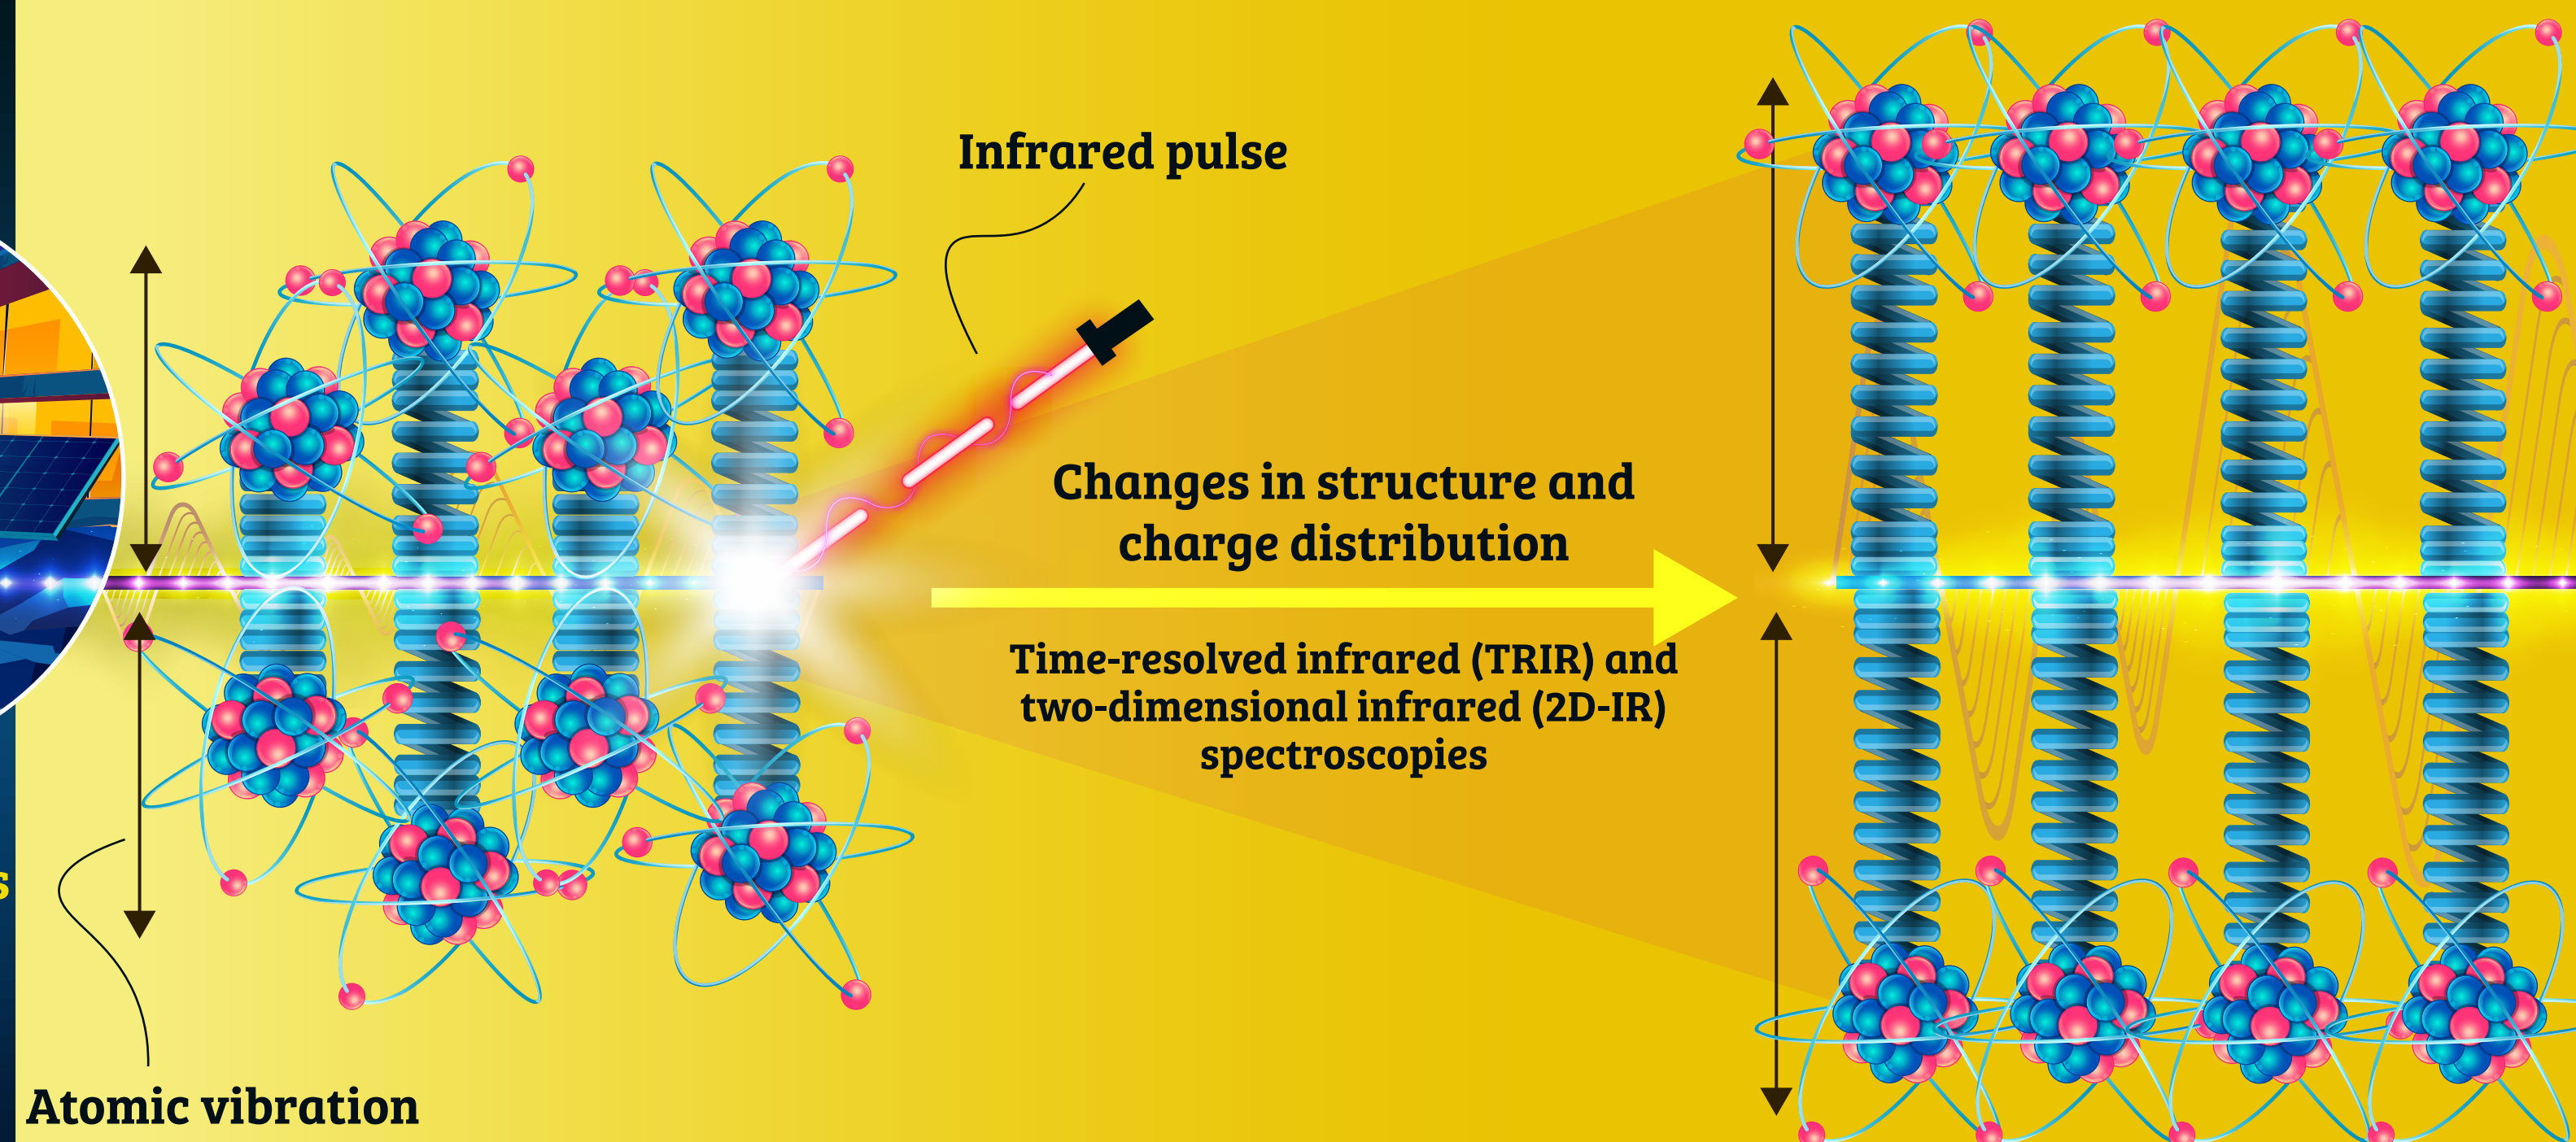

IRAVs originate from the strong coupling of charge redistribution to nuclear motion

Ultrafast time-resolved infrared spectroscopy can be used to study structure-property relationships in organic semiconductors and related molecules

Chemical  
Science

PICK  
OF THE  
WEEK

Mechanisms of IR Amplification in Radical Cation Polarons

Parker and Anderson *et al.* (2020) | DOI: 10.1039/C9SC05717J

ROYAL SOCIETY  
OF CHEMISTRY
